## Author Index

- Abdellah, M. i574  
Abeln, S. i4  
Afrabandpey, H. i395  
Agrawal, M. i457  
Ah-Fong, A.M.V. i43  
Ahn, S. i23  
Ahn, T.-H. i422  
Airola, A. i509  
Aittokallio, T. i509  
Almodaresi, F. i169  
Amos, R.B. i245  
Antille, N. i574  
Antipov, D. i142  
Anton Feenstra, K. i4  
Aoki, G. i237  
Aragam, B. i178  
Arany, A. i447  
Asgari, E. i32  
  
Bailey-Kellogg, C. i245  
Ballnus, B. i494  
Bauer, D.E. i202  
Beerenwinkel, N. i519  
Blatti, C. i547  
Bock, C. i438  
Böcker, S. i333  
Borgwardt, K. i438  
Boutillier, P. i583  
Branco dos Santos, F. i4  
Braun, E.L. i350  
Bretschneider, H. i429  
Bromberg, Y. i2, i304  
Bu, D. i263  
  
Cho, Y.-R. i537  
Choi, Y. i245  
Cichonska, A. i509  
Clement, K. i202  
Costello, J.C. i555  
Cristescu, I. i583  
  
Dae, P. i395  
De Cristofaro, E. i160  
DeBlasio, D. i13  
Dehio, C. i519  
Deshwar, A.G. i429  
Dölken, L. i218  
Dührkop, K. i333  
Durbin, R. i105  
  
Eaton, J. i357  
Eicher, S. i519  
Eichler, E.E. i115  
Eilemann, S. i574  
ElShal, S. i447  
Emmenlauer, M. i519  
Erhard, F. i218  
Eskin, E. i467  
  
Fan, J. i124  
Fan, M. i284  
Farouni, R. i202  
Feret, J. i583  
Flemington, E.K. i404  
Fontana, W. i583  
Forbes, A.G. i583  
Frey, B.J. i429  
Fröhlich, F. i151  
Fu, Y. i386  
Furlon, J.M. i245  
  
Gabel, H.W. i422  
Gai, L. i467  
Gandhi, S. i429  
Gao, X. i52, i284  
Garakani, K. i32  
Garg, S. i105  
Garrison, E. i105  
Ghareghani, M. i115  
Glouzon, J.-P.S. i70  
Gönen, M. i412  
Gong, H. i422  
Gonzalez-Hernandez, G. i565  
Goodspeed, A. i555  
Griswold, K.E. i245  
Gumbsch, T. i438  
Guo, Q. i227  
Gurevich, A. i142  
  
Han, R. i284  
Hasenauer, J. i151, i494  
Havulinna, A. i395  
He, C. i395  
Heckman, C. i395  
Heinonen, M. i274, i509  
Her, H.-L. i89  
Heringa, J. i4  
Hernando, J. i574  
Hoefsloot, H.C.J. i4  
  
Hoehndorf, R. i52  
Hu, L. i386  
  
Ideker, T. i484  
  
Jacucci, G. i395  
Jiang, Y. i313  
Johnson, R. i195  
Jokinen, E. i274  
Judelson, H.S. i43  
Julkunen, H. i509  
Jürges, C. i218  
  
Kalecky, K. i537  
Kannan, S. i124  
Kaski, S. i395  
Ke, Z. i23  
Kim, S. i254  
Kingsford, C. i13, i475  
Kleinstein, S.H. i341  
Korbel, J.O. i115  
Kostka, D. i79  
Krivine, J. i583  
Kuipers, J. i519  
  
Lafond, M. i366  
Lähdesmäki, H. i274  
Lapere, S. i574  
Lengerich, B.J. i178  
Leskovec, J. i457  
Li, L. i284, i386  
Li, X. i583  
Li, Y. i284  
Lin, D. i96  
Liu, J. i96  
Lonardi, S. i43  
Ludwig, M. i333  
  
Ma, J. i133, i484  
Maasha, M. i583  
Magge, A. i565  
Mahlich, Y. i304  
Mamitsuka, H. i323  
Mamun Majumder, M. i395  
Marçais, G. i13  
Markram, H. i574  
Marschall, T. i105, i115  
Marttinen, P. i395  
McCoy, M.J. i422

- McHardy,A.C. i32  
 Medina-Abarca,H.F. i583  
 Meghdari Miardan,M. i366  
 Meiers,S. i115  
 Micallaf,L. i395  
 Mikheenko,A. i142  
 Mofrad,M.R.K. i32  
 Molenaar,D. i4  
 Moor,M. i438  
 Moreau,Y. i447  
 Mukherjee,S. i124
- Nakhleh,L. i376  
 Nguyen,C.H. i323  
 Nguyen,D.H. i323  
 Noble,W.S. i96  
 Nouri,N. i341  
 Novak,A.M. i105
- Oh,M. i254  
 Oprisanu,B. i160  
 Ouangraoua,A. i70  
 Özgür,A. i295  
 Ozkirimli,E. i295  
 Öztürk,H. i295
- Pahikkala,T. i509  
 Pan,W. i43  
 Park,Y. i254  
 Pasaniuc,B. i195  
 Patkar,S. i502  
 Patro,R. i169  
 Paul,A.J. i422  
 Peltola,T. i395  
 Peng,J. i386,i528  
 Peng,Y. i313  
 Petralia,F. i528  
 Pielke-Lombardo,H. i555  
 Pinello,L. i202  
 Porubský,D. i115  
 Pouyan,M.B. i79  
 Powers,R.K. i555  
 Prjibelski,A. i142
- Qi,J. i386
- Qian,X. i61
- Radivojac,P. i2,i313  
 Rahimi,A. i412  
 Raphael,B.J. i211  
 Rautiainen,M. i105  
 Richner,M. i422  
 Rieck,B. i438  
 Roqueiro,D. i438  
 Rost,B. i304  
 Rousu,J. i509
- Sakakibara,Y. i237  
 Sanders,A.D. i115  
 Sankararaman,S. i187,i195  
 Sankoff,D. i366  
 Sarkar,H. i169  
 Sarker,A. i565  
 Satas,G. i211  
 Sauerwald,N. i475  
 Saveliev,V. i142  
 Schaper,S. i494  
 Schmich,F. i519  
 Schürmann,F. i574  
 Schwartz,R. i357  
 Scotch,M. i565  
 Seelig,G. i124  
 Seo,S. i254  
 Serim,B. i395  
 Sharan,R. i502  
 Shi,H. i195  
 Simm,J. i447  
 Sinha,S. i547  
 Smaili,F.Z. i52  
 Soare,M. i395  
 Srivastava,A. i169  
 Srivatsa,S. i519  
 Stapor,P. i151  
 Steinegger,M. i304  
 Sundin,I. i395  
 Szedmak,S. i509
- Tan,A.-C. i555  
 Teusink,B. i4  
 Theis,F.J. i494
- Victor,M.B. i422  
 Vikalo,H. i23
- Wanamaker,S.I. i43  
 Wang,J. i357  
 Wang,L. i528  
 Wang,P. i528  
 Wang,S. i263  
 Wang,Y. i133  
 Weissenbacher,D. i565  
 Westerhuis,J.A. i4  
 Wu,Y. i187  
 Wu,Y.-W. i89
- Xiao,J. i547  
 Xing,E.P. i178  
 Xing,W. i386  
 Xiong,S. i386  
 Xu,F. i284  
 Xu,J. i263  
 Xu,M. i227  
 Xu,P. i284
- Yan,A. i528  
 Yang,Y. i133  
 Yardımcı,G.G. i96  
 Yoo,A.S. i422  
 Yuan,X. i386
- Zakeri,P. i447  
 Zamani Dadaneh,S. i61  
 Zeng,X. i227  
 Zhang,F. i284  
 Zhang,K. i404  
 Zhang,M. i284  
 Zhang,R. i133  
 Zhang,W. i404,i484  
 Zhang,X. i386  
 Zhang,Y. i124,i133  
 Zhao,Y. i227  
 Zhou,M. i61  
 Zhu,J. i263,i376,i528  
 Zitnik,M. i457  
 Zuberi,K. i429
